# Supplementary material for: Multi-modulation for self-assemblies of amphiphilic rigid–soft compounds through alteration of solution polarity and temperature
Source: Royal Society of Chemistry journal article supplement (doi:10.1039/c7sm01754e), 2017-01-01
Supplement: c7sm01754e1.pdf [file c7sm01754e1.pdf]

## **Supporting Information**

### **Multi-Modulation for Self-Assemblies of Amphiphilic Rigid-Soft Compounds Through Alteration of Solution Polarity and Temperature**

Xiaoying Li,<sup>[a],[b]</sup> Chun-Ting Poon,<sup>[b]</sup> Eugene Yau-Hin Hong,<sup>[b]</sup> Hok-Lai Wong,<sup>[b]</sup>  
Alan Kwun-Wa Chan,<sup>[b]</sup> Lixin Wu,<sup>\*[a]</sup> and Vivian Wing-Wah Yam<sup>\*[a],[b]</sup>

<sup>[a]</sup>State Key Laboratory of Supramolecular Structure and Materials and College of  
Chemistry, Jilin University, Changchun 130012, P. R. China

<sup>[b]</sup>Institute of Molecular Functional Materials [Areas of Excellence Scheme,  
University Grants Committee (Hong Kong)] and Department of Chemistry,  
The University of Hong Kong, Pokfulam Road, Hong Kong, P. R. China

E-mail: wwyam@hku.hk

## Crystallographic Data

**Table S1** Crystal and structure determination data of compound **5**

|                                                     |                                                                 |                              |
|-----------------------------------------------------|-----------------------------------------------------------------|------------------------------|
| Empirical formula                                   | $C_{74}H_{60}N_2O_{12} \cdot 2CH_2Cl_2$                         |                              |
| Formula weight                                      | 1339.09                                                         |                              |
| Temperature                                         | 296(2) K                                                        |                              |
| Wavelength                                          | 0.71073 Å                                                       |                              |
| Crystal system                                      | Triclinic                                                       |                              |
| Space group                                         | $P\bar{1}$                                                      |                              |
| Unit cell dimensions                                | $a = 10.910(5)$ Å                                               | $\alpha = 103.07(2)^\circ$   |
|                                                     | $b = 13.241(8)$ Å                                               | $\beta = 106.042(17)^\circ$  |
|                                                     | $c = 14.469(7)$ Å                                               | $\gamma = 113.592(19)^\circ$ |
| Volume                                              | 1701.1(16) Å <sup>3</sup>                                       |                              |
| <i>Z</i>                                            | 4                                                               |                              |
| Density (calculated)                                | 1.307 mg m <sup>-3</sup>                                        |                              |
| Absorption coefficient                              | 0.238 mm <sup>-1</sup>                                          |                              |
| <i>F</i> <sub>000</sub>                             | 698                                                             |                              |
| Crystal size                                        | 0.47 mm × 0.15 mm × 0.11 mm                                     |                              |
| $\theta$ range for data collection                  | 2.99 to 25.00°                                                  |                              |
| Index ranges                                        | $-12 \leq h \leq 11, -15 \leq k \leq 15, -17 \leq l \leq 17$    |                              |
| Reflections collected                               | 13409                                                           |                              |
| Independent reflections                             | 5944 [ <i>R</i> <sub>int</sub> = 0.0596]                        |                              |
| Completeness to $\theta = 25.242^\circ$             | 99.2 %                                                          |                              |
| Absorption correction                               | Semi-empirical from equivalents                                 |                              |
| Max. and min. transmission                          | 0.9743 and 0.8954                                               |                              |
| Refinement method                                   | Full-matrix least-squares on <i>F</i> <sup>2</sup>              |                              |
| Data / restraints / parameters                      | 5944 / 0 / 448                                                  |                              |
| Goodness-of-fit on <i>F</i> <sup>2</sup>            | 1.055                                                           |                              |
| Final <i>R</i> indices [ <i>I</i> > 2σ( <i>I</i> )] | <i>R</i> <sub>1</sub> = 0.0731, <i>wR</i> <sub>2</sub> = 0.2118 |                              |
| <i>R</i> indices (all data)                         | <i>R</i> <sub>1</sub> = 0.1225, <i>wR</i> <sub>2</sub> = 0.2517 |                              |
| Large diff. peak and hole                           | 0.629 and -0.731 eÅ <sup>-3</sup>                               |                              |

## Self-Assembly Studies

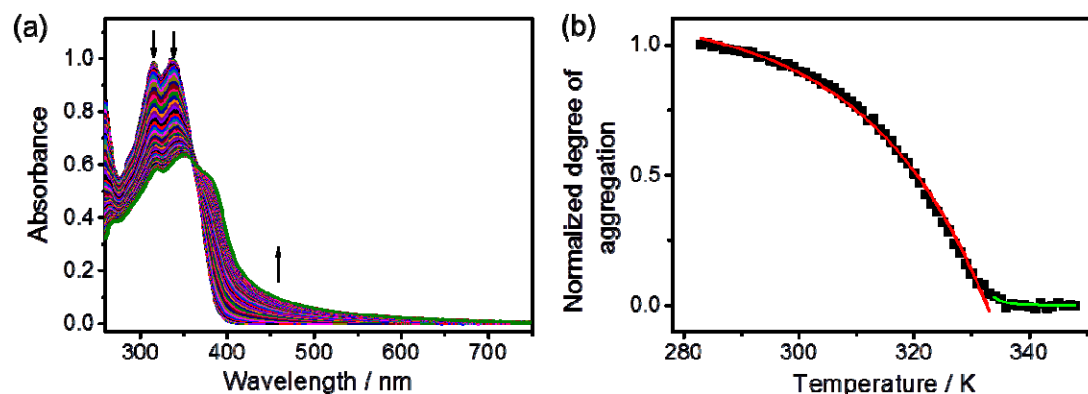

**Figure S1.** (a) UV-Vis absorption spectral traces on cooling a solution of **1** in 70 % DMSO–water mixture ( $1.2 \times 10^{-5}$  M). (b) Plot of normalized degree of aggregation as a function of temperature, with curve fitting at the nucleation (green line) and the elongation (red line) regimes.

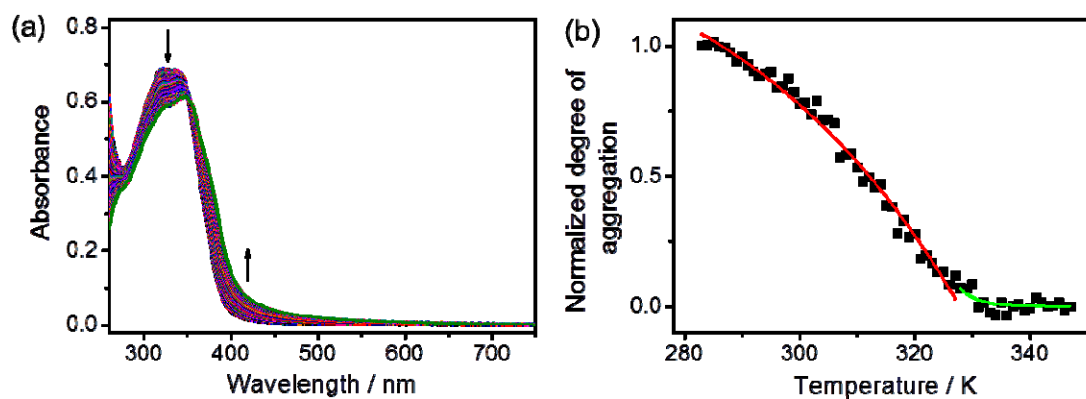

**Figure S2.** (a) UV-Vis absorption spectral traces on cooling a solution of **3** in 70 % DMSO–water mixture ( $1.2 \times 10^{-5}$  M). (b) Plot of normalized degree of aggregation as a function of temperature, with curve fitting at the nucleation (green line) and the elongation (red line) regimes.

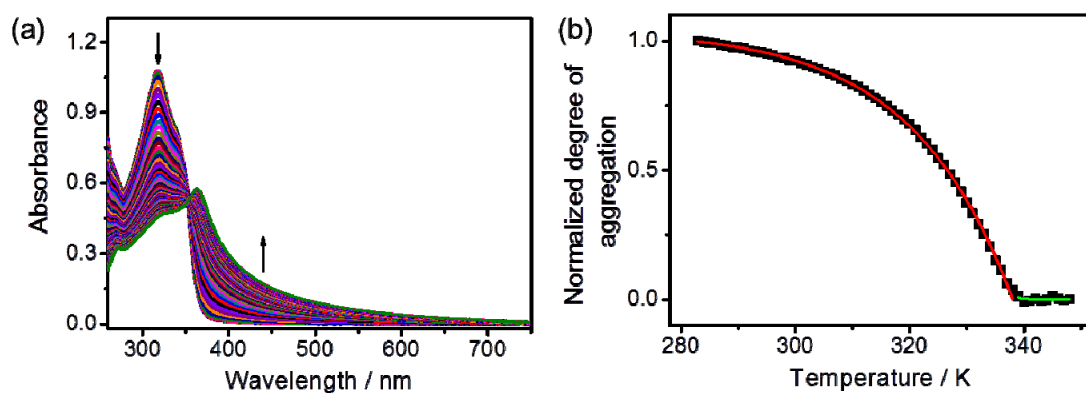

**Figure S3.** (a) UV-Vis absorption spectral traces on cooling a solution of **4** in 70 % DMSO–water mixture ( $1.6 \times 10^{-5}$  M). (b) Plot of normalized degree of aggregation as a function of temperature, with curve fitting at the nucleation (green line) and the elongation (red line) regimes.

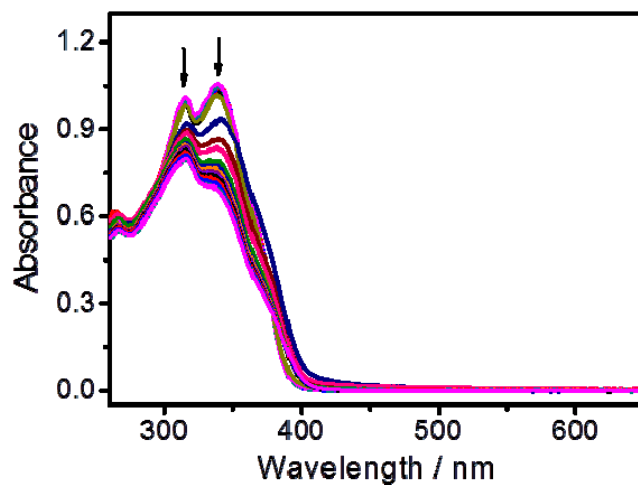

**Figure S4.** UV-Vis absorption spectral traces of **1** ( $1.2 \times 10^{-5}$  M) upon increasing the water content in DMSO at 298 K.

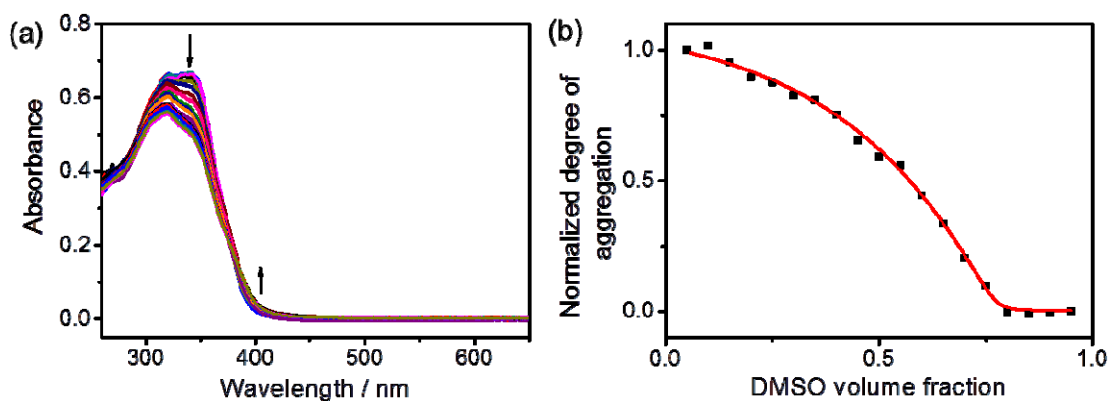

**Figure S5.** (a) UV-Vis absorption spectral traces of **3** ( $1.2 \times 10^{-5}$  M) upon increasing the water content in DMSO at 298 K. (b) Plot of normalized degree of aggregation as a function of DMSO volume fraction with curve fitting to the nucleation–elongation model.

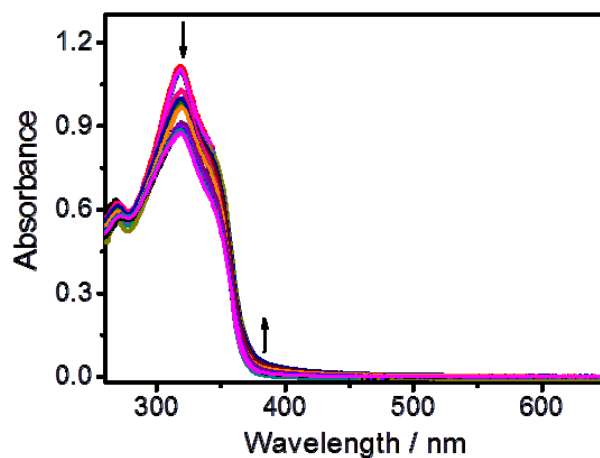

**Figure S6.** UV-Vis absorption spectral traces of **4** ( $1.6 \times 10^{-5}$  M) upon increasing the water content in DMSO at 298 K.

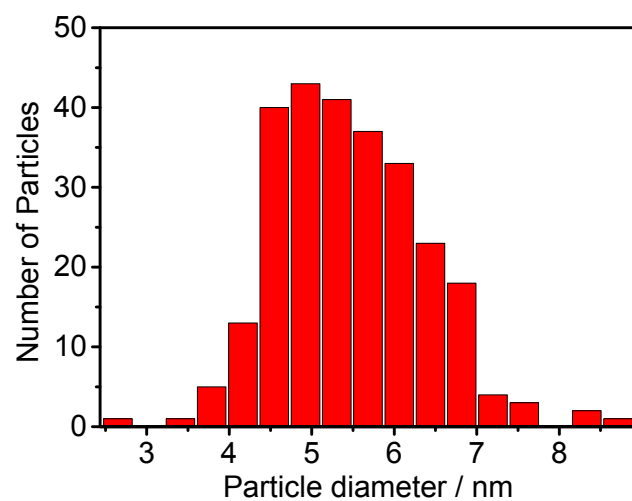

**Figure S7.** Statistical distribution of the particle sizes (total 265) taken from the TEM image in Figure 7a for compound **4** in aqueous solution ( $1.5 \times 10^{-3}$  M) at room temperature.

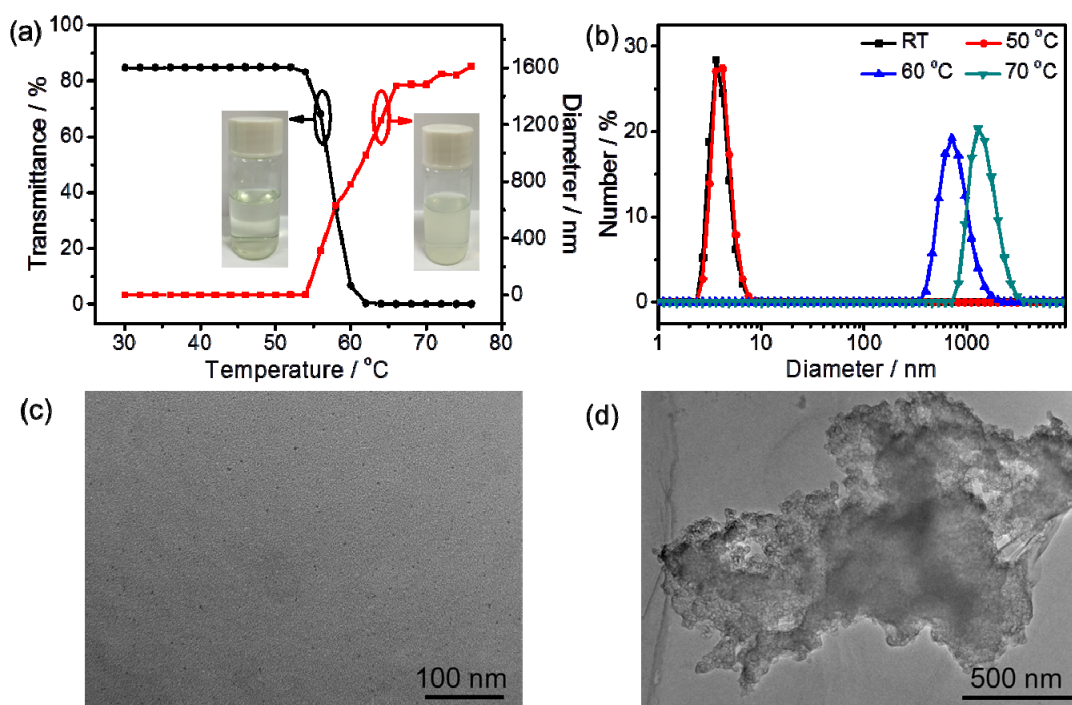

**Figure S8.** (a) Turbidity curves (measured at 550 nm) and the plot of hydrodynamic diameter obtained from DLS *via* heating of **3** in aqueous solution ( $4.0 \times 10^{-4}$  M). Insets: Photographs of the aqueous solutions below and above cloud point temperature ( $T_{\text{cloud}}$ ). (b) Size distributions of **3** in aqueous solution ( $4.0 \times 10^{-4}$  M) for selected temperatures from DLS. (c) TEM images of the aggregates prepared from **3** in aqueous solution ( $4.0 \times 10^{-4}$  M) at room temperature. (d) TEM images of the aggregates prepared from **3** in aqueous solution ( $4.0 \times 10^{-4}$  M) at 65 °C.

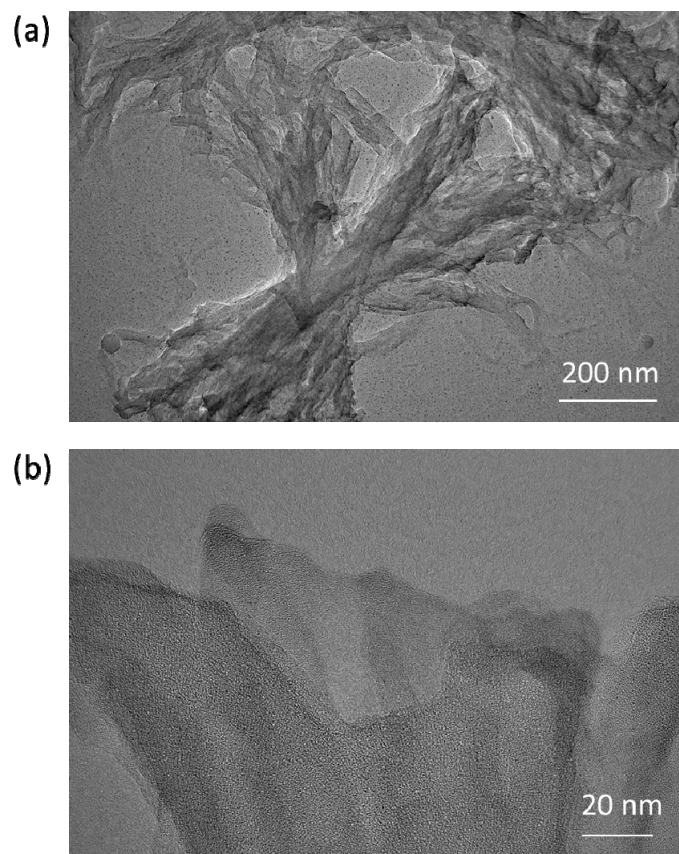

**Figure S9.** TEM images of compound **5** in the mixture of THF and ethanol with volume ratio of 1:1 at room temperature.



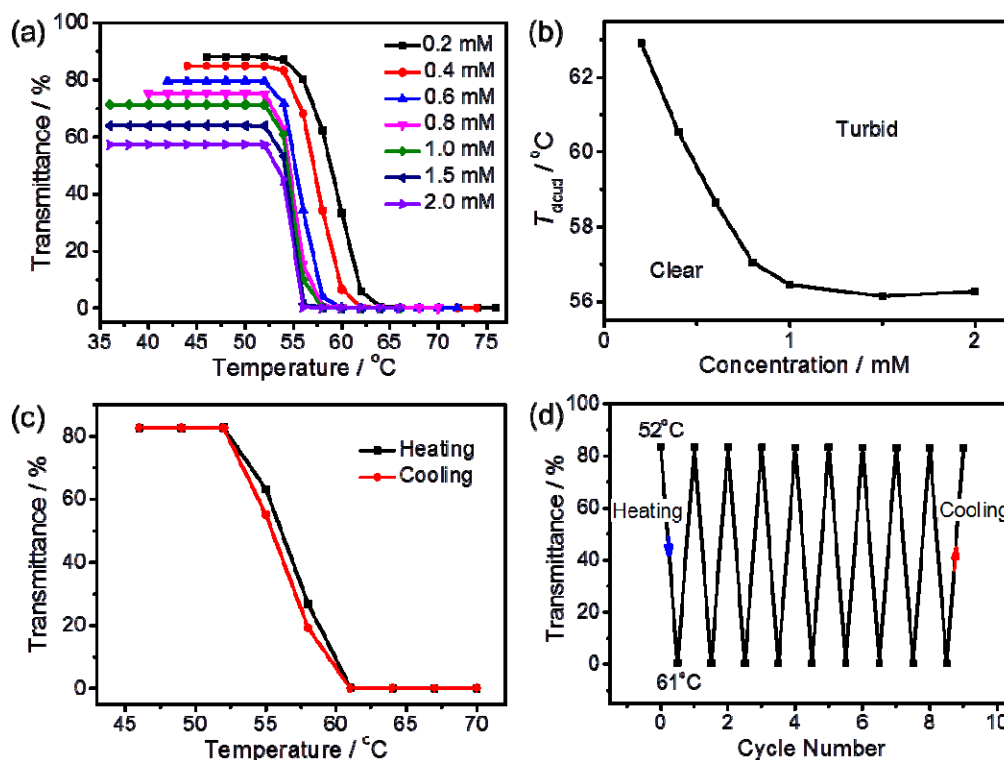

**Figure S10.** (a) Turbidity curves (measured at 550 nm) of 3 at different concentrations in aqueous solution. (b) Concentration dependence of the cloud point temperature ( $T_{\text{cloud}}$ ) of 3 in aqueous solution. (c) Plots of transmittance at 550 nm of the aqueous solution of 3 ( $4 \times 10^{-4}$  M) via a heating-cooling cycle. (d) Plots of transmittance at 550 nm of the aqueous solution of 3 ( $4 \times 10^{-4}$  M) when cycling between 52 °C and 61 °C.

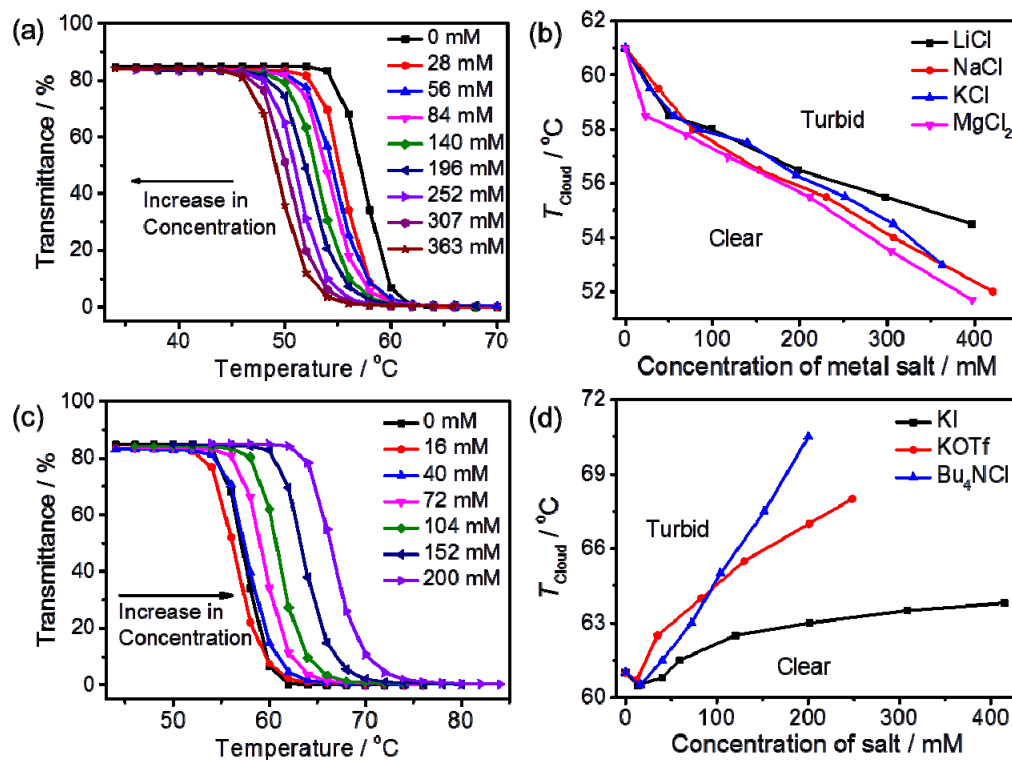

**Figure S11.** (a) Turbidity curves (measured at 550 nm) of **3** at different concentrations of  $K^+$  in aqueous solution. (b) Concentration dependence of the cloud point temperature ( $T_{cloud}$ ) of **3** in aqueous solution with different concentrations of  $Li^+$ ,  $Na^+$ ,  $K^+$  and  $Mg^{2+}$ . (c) Turbidity curves (measured at 550 nm) of **3** at different concentrations of  $nBu_4NCl$  in aqueous solution. (d) Concentration dependence of the cloud point temperature ( $T_{cloud}$ ) of **3** in aqueous solution with different concentrations of KI, KOTf and  $nBu_4NCl$ .

## NMR Spectra

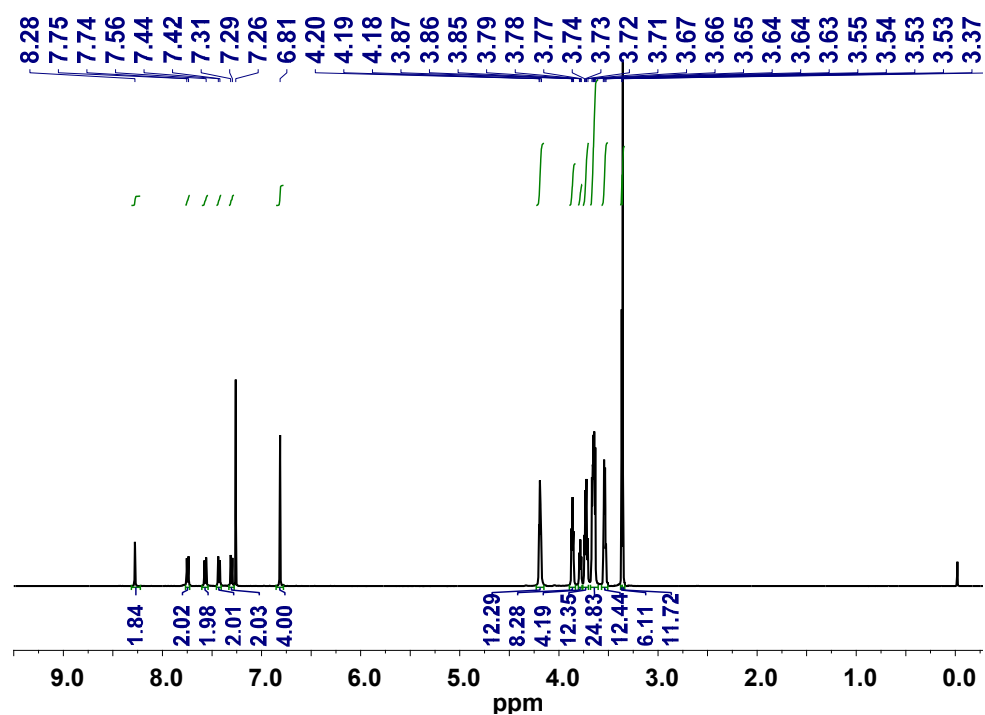

**Figure S12.**  $^1\text{H}$  NMR spectrum of 9-(4-bromophenyl)-3,6-bis((3,4,5-tris(triethyleneglycol methyl ether)phenyl)ethynyl)-9*H*-carbazole in  $\text{CDCl}_3$ .

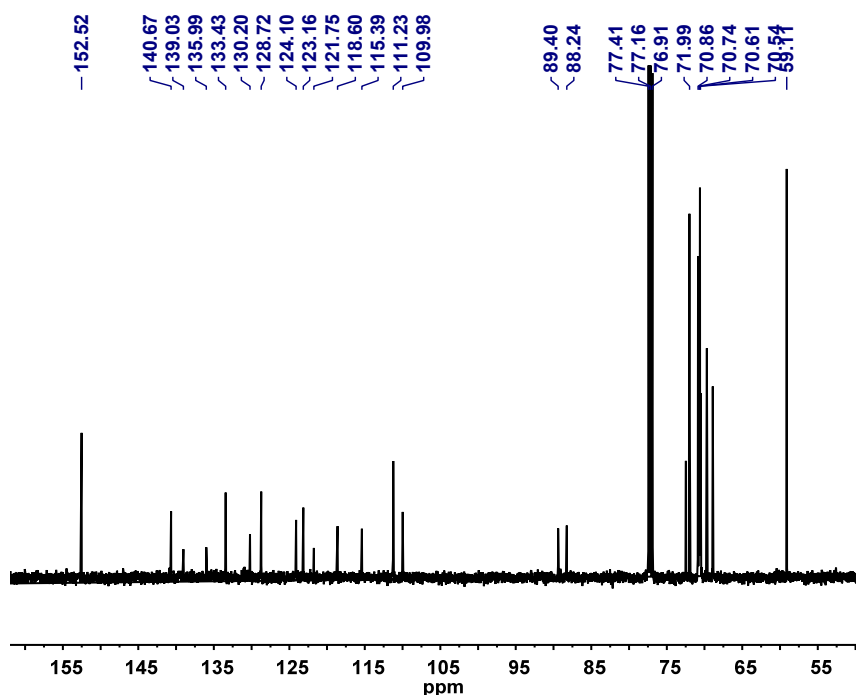

**Figure S13.**  $^{13}\text{C}\{^1\text{H}\}$  NMR spectrum of 9-(4-bromophenyl)-3,6-bis((3,4,5-tris(triethyleneglycol methyl ether)phenyl)ethynyl)-9*H*-carbazole in  $\text{CDCl}_3$ .

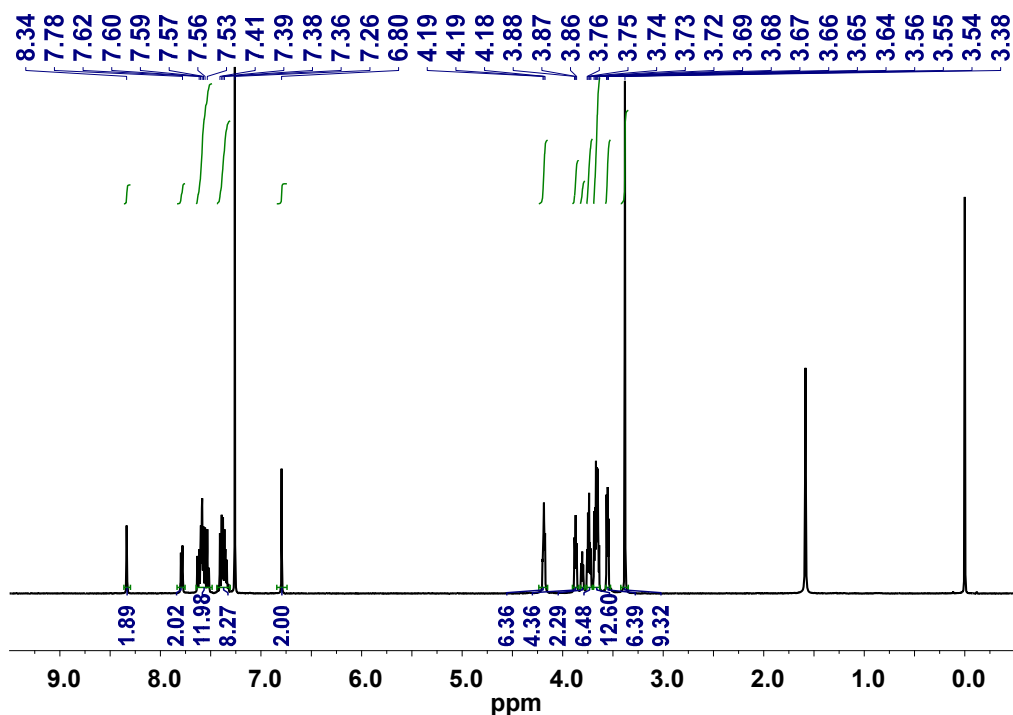

Figure S14.  $^1\text{H}$  NMR spectrum of **1** in  $\text{CDCl}_3$ .

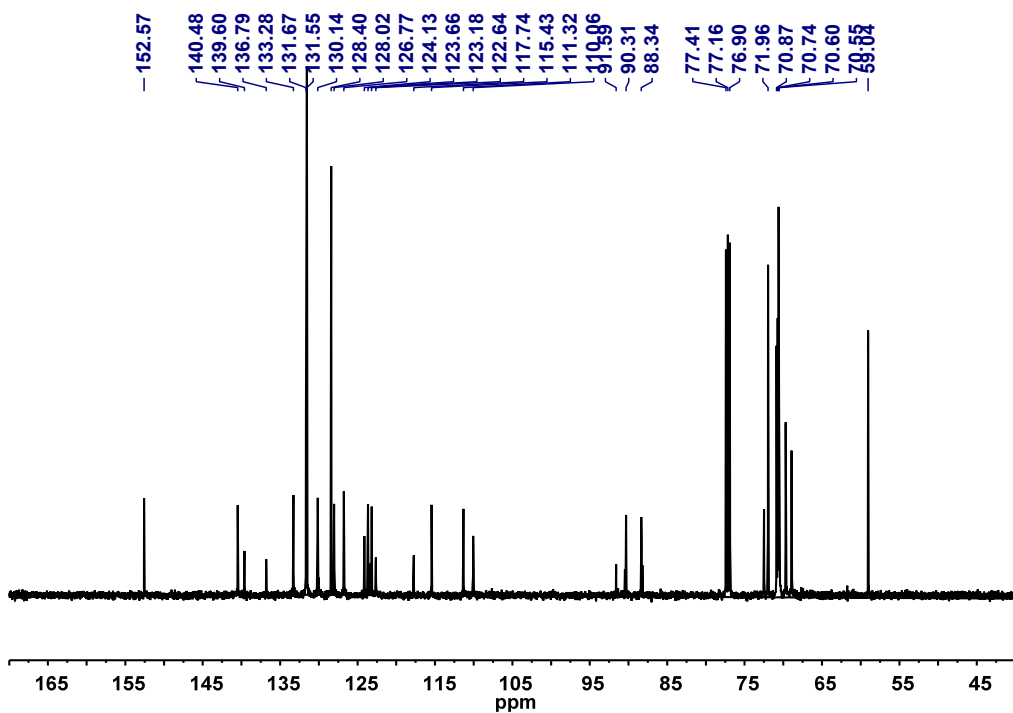

Figure S15.  $^{13}\text{C}\{^1\text{H}\}$  NMR spectrum of **1** in  $\text{CDCl}_3$ .

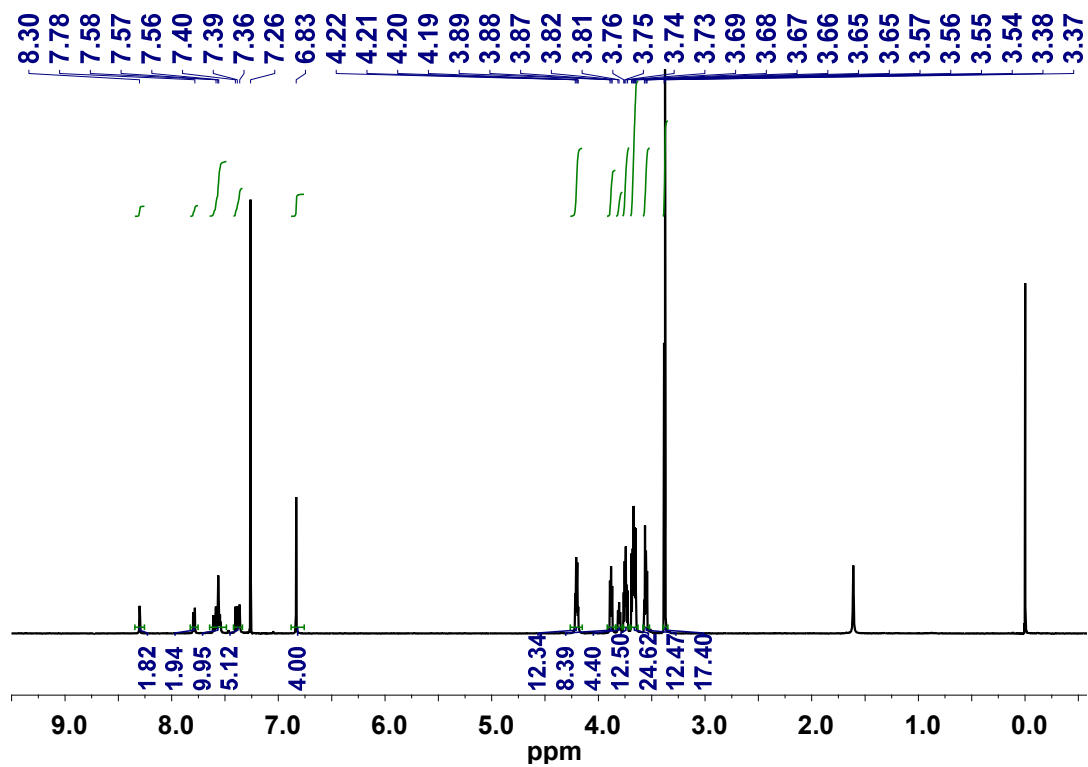

Figure S16.  $^1\text{H}$  NMR spectrum of **2** in  $\text{CDCl}_3$ .

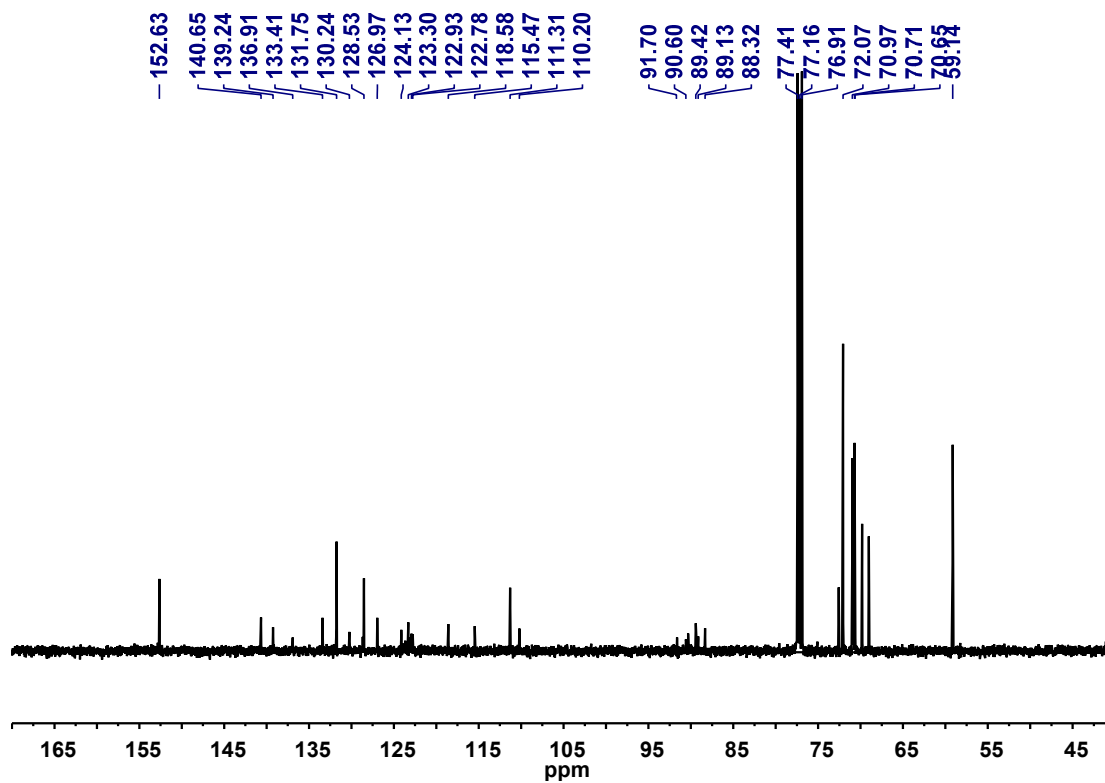

Figure S17.  $^{13}\text{C}\{^1\text{H}\}$  NMR spectrum of **2** in  $\text{CDCl}_3$ .

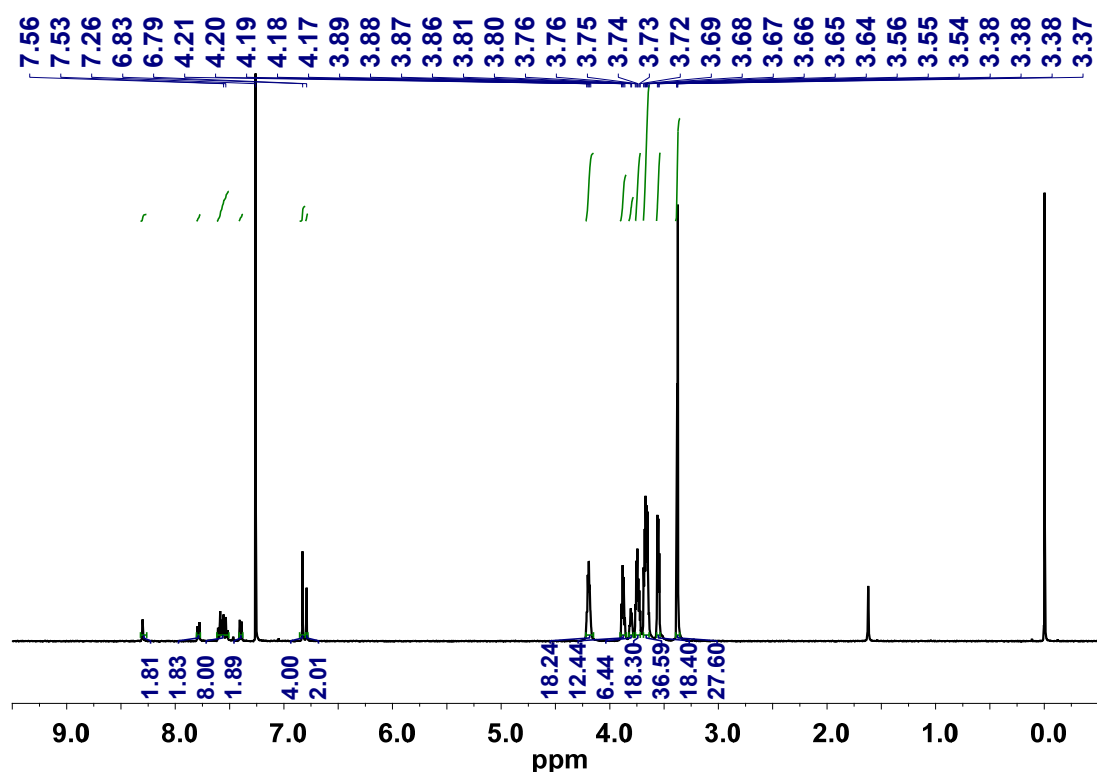

Figure S18.  $^1\text{H}$  NMR spectrum of **3** in  $\text{CDCl}_3$ .

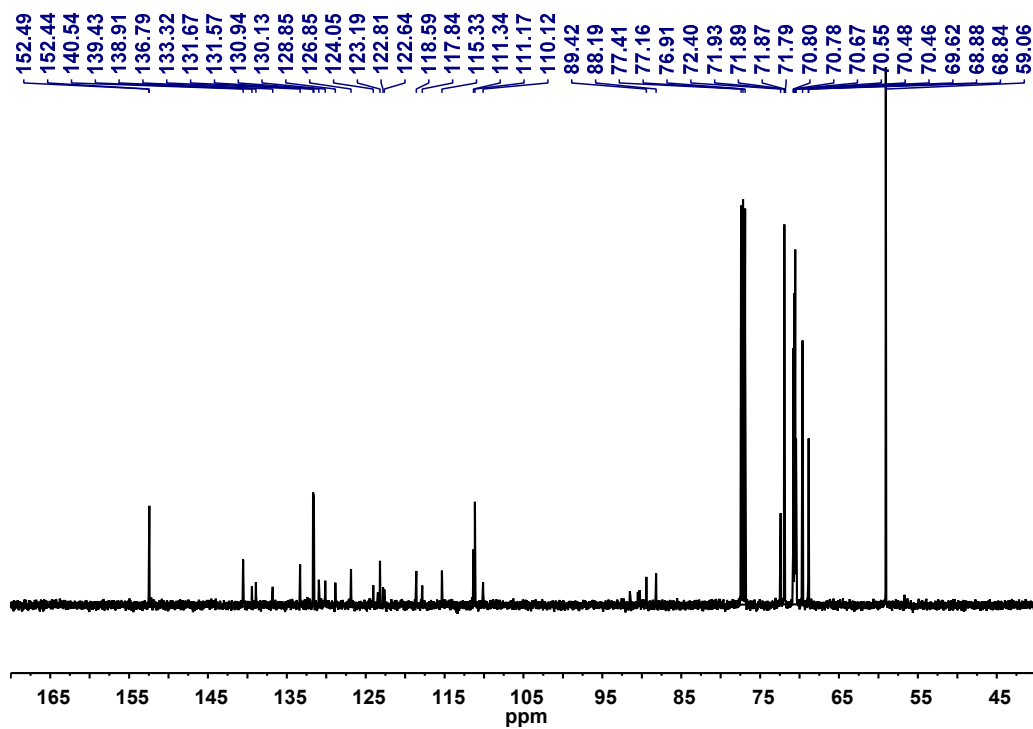

Figure S19.  $^{13}\text{C}\{^1\text{H}\}$  NMR spectrum of **3** in  $\text{CDCl}_3$ .

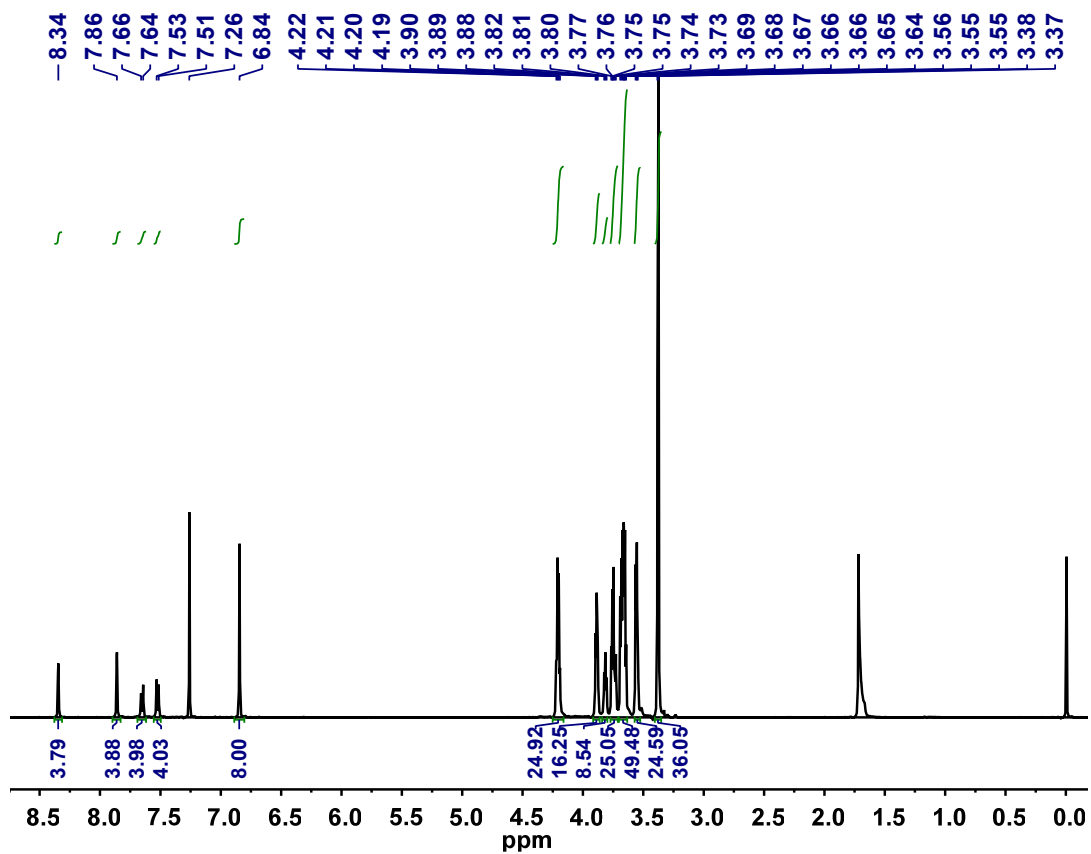

Figure S20.  $^1\text{H}$  NMR spectrum of **4** in  $\text{CDCl}_3$ .

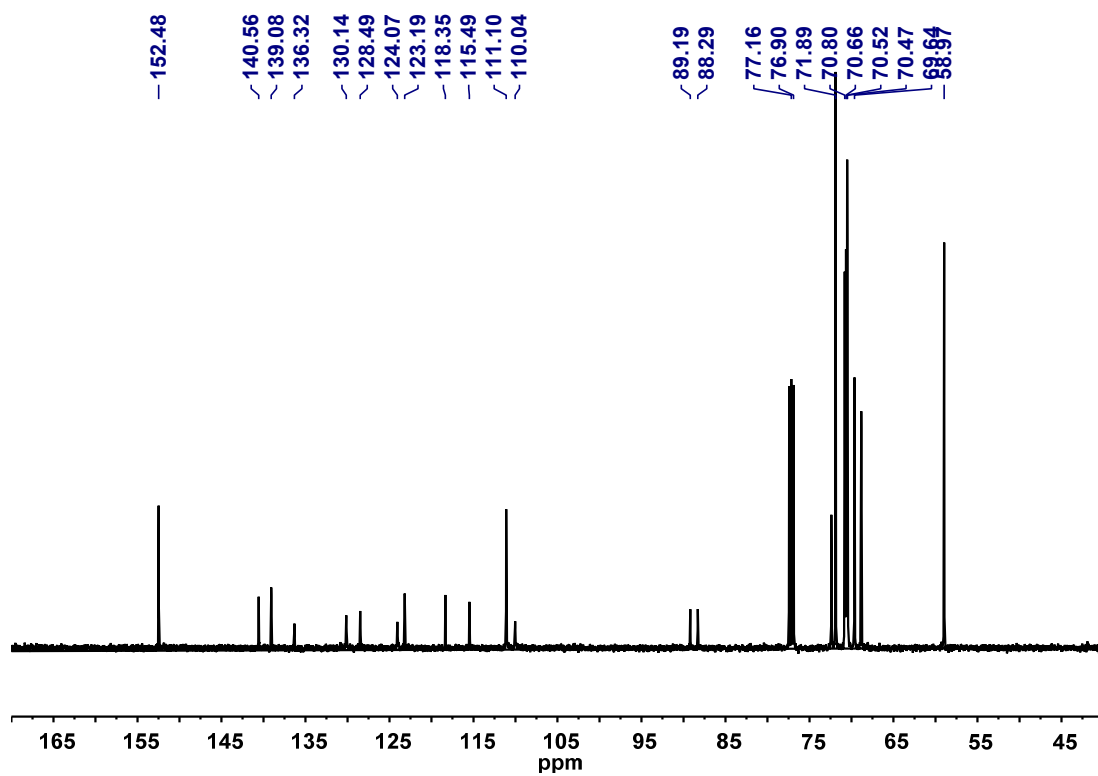

Figure S21.  $^{13}\text{C}\{^1\text{H}\}$  NMR spectrum of **4** in  $\text{CDCl}_3$ .

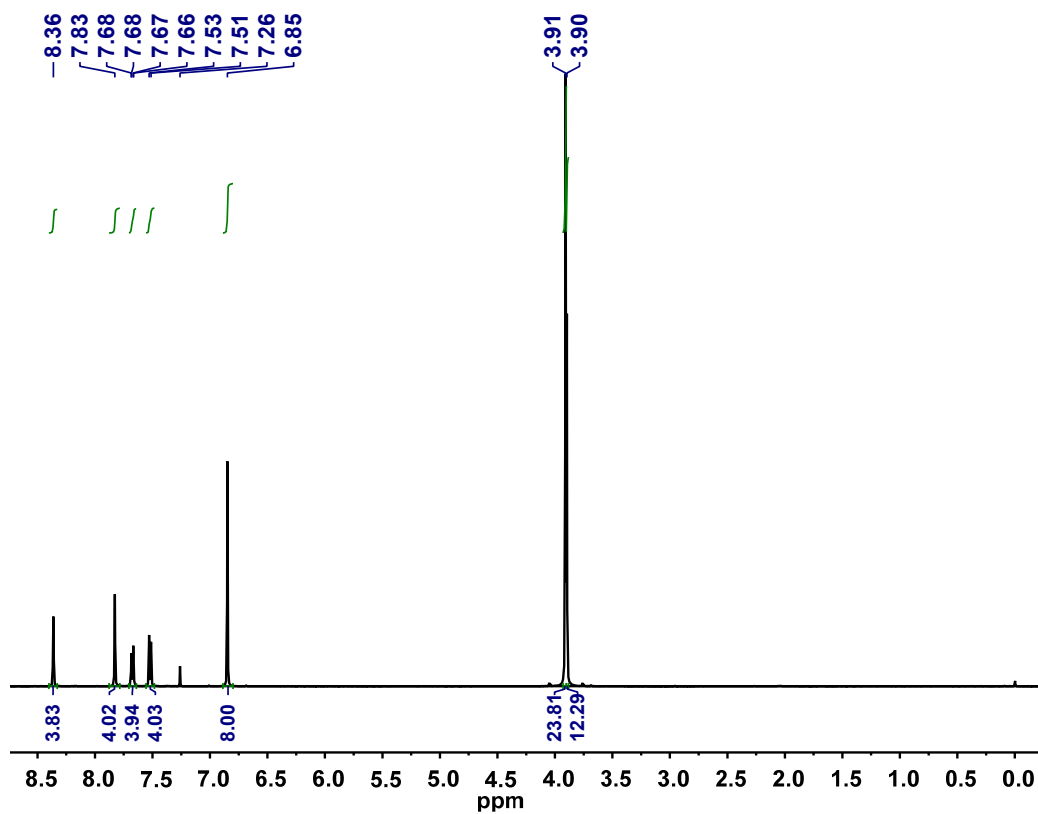

Figure S22.  $^1\text{H}$  NMR spectrum of **5** in  $\text{CDCl}_3$ .

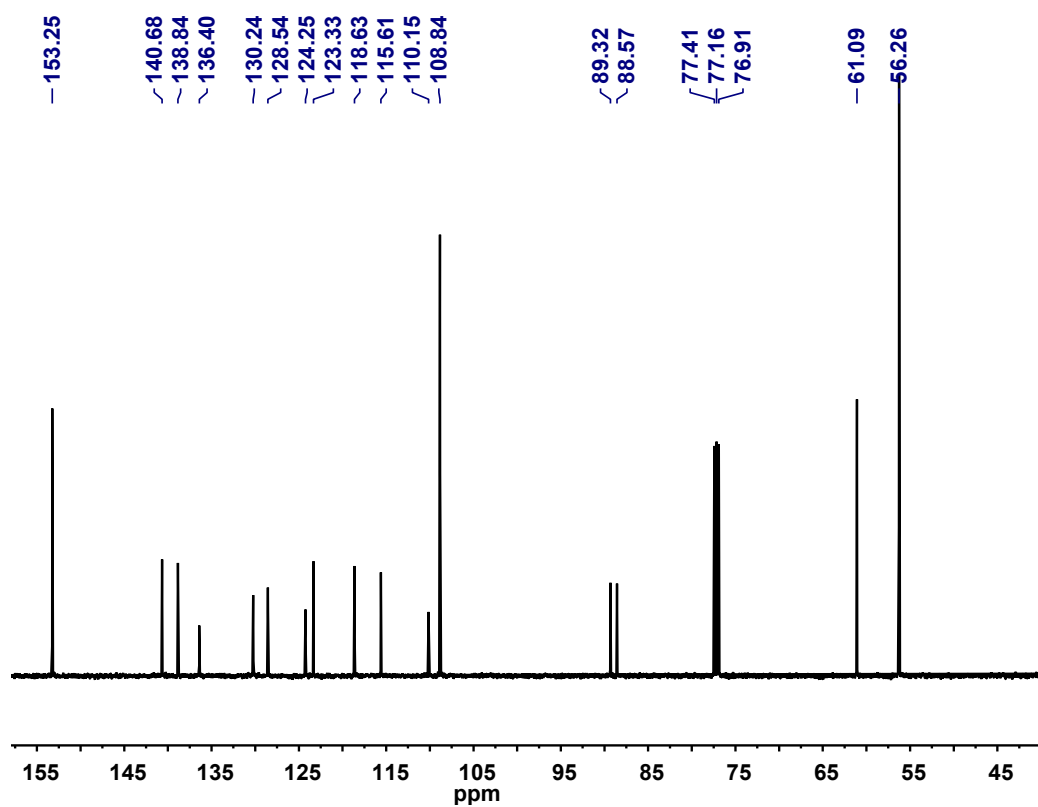

Figure S23.  $^{13}\text{C}\{^1\text{H}\}$  NMR spectrum of **5** in  $\text{CDCl}_3$ .
